# Supplementary material
Source: Springer Nature journal article supplement (https://www.springermedizin.de/resource/supplementary/12865_2009_284_MOESM3_ESM.pdf/9427676)

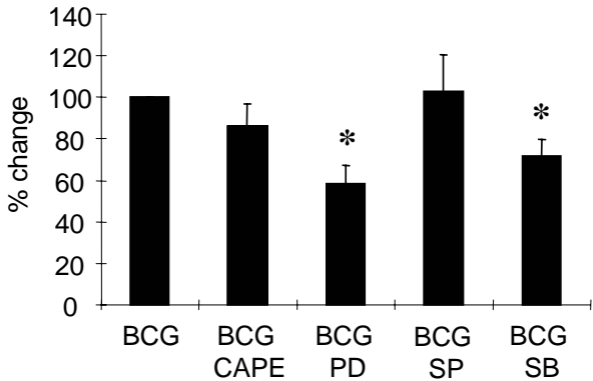

Supplement: MOESM3 [file 9427676]
